# Supplementary material for: Acid- and base-resistant antimicrobial hydrogels based on polyoxometalates and chitosan
Source: Royal Society of Chemistry journal article supplement (doi:10.1039/d4pm00062e), 2024-01-01
Supplement: d4pm00062e1.pdf [file d4pm00062e1.pdf]

## Supporting Information

### Acid- and Base-Resistant Antimicrobial Hydrogels based on Polyoxometalates and Chitosan

Callum McWilliams,<sup>a,b</sup> Isabel Franco-Castillo,<sup>a,b</sup> Andrés Seral Ascaso,<sup>a,b</sup> Sonia García-Embid,<sup>a,b</sup> Mariella Malefioudaki,<sup>a,b</sup> Johann G. Meier,<sup>c</sup> Rafael Martín-Rapún\*,<sup>a,b</sup> Scott G. Mitchell\*<sup>a,b</sup>

a Instituto de Nanociencia y Materiales de Aragón (INMA), CSIC-Universidad de Zaragoza, c/Pedro Cerbuna 12, 50009 Zaragoza, Spain.

b CIBER de Bioingeniería, Biomateriales y Nanomedicina, Instituto de Salud Carlos III, 28029 Madrid, Spain.

c ITAINNOVA – Instituto Tecnológico de Aragón, Calle María de Luna, n° 7, Zaragoza, 50018, Spain.

\* corresponding author email: [scott.mitchell@csic.es](mailto:scott.mitchell@csic.es)

**Keywords:** Polyoxometalate, chitosan, hydrogels, antimicrobial materials, acid-resistance, base-resistance

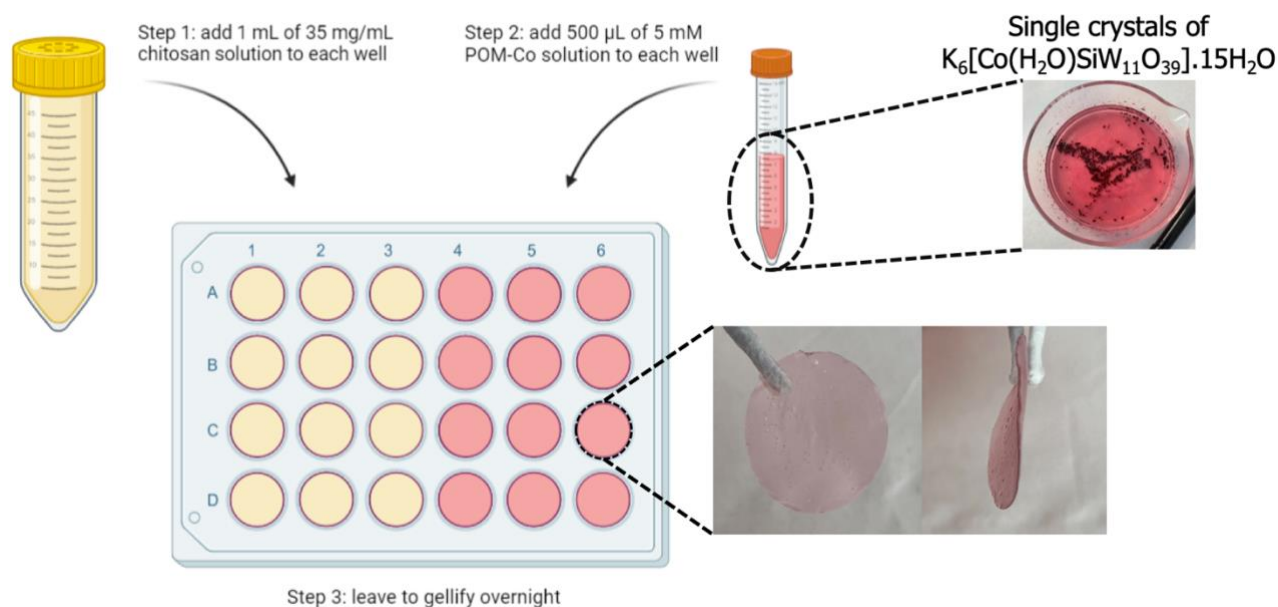

**Figure S1.** Schematic illustration of the synthesis of the CoSiW<sub>11</sub>@CS hydrogel.

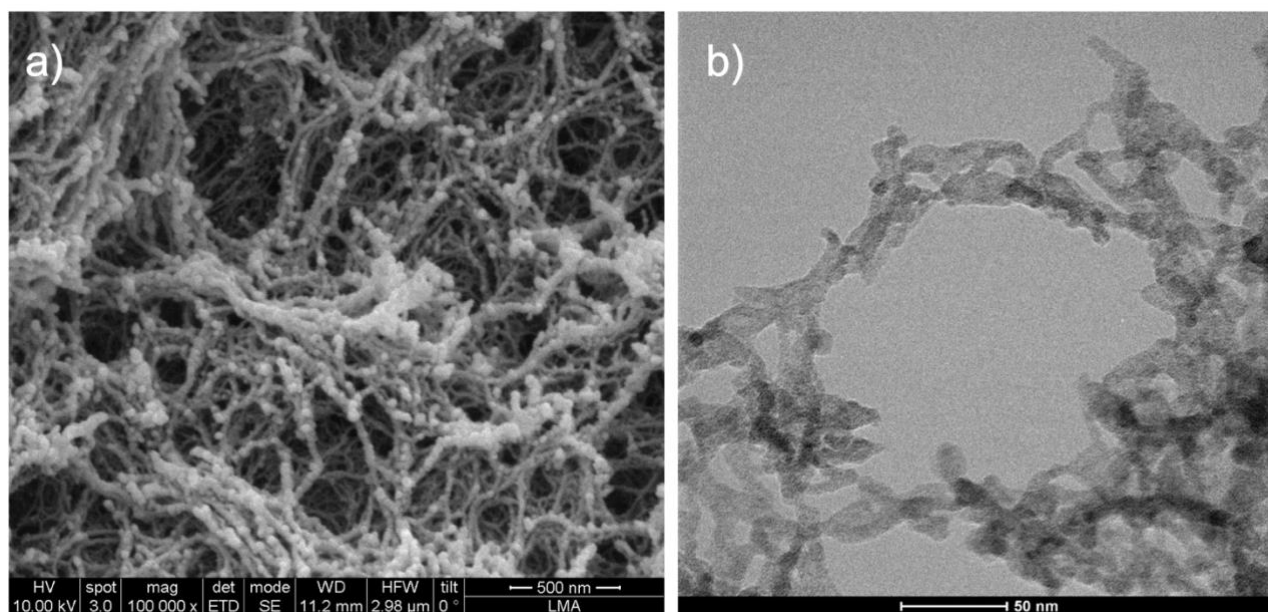

**Figure S2.** a) SEM and b) TEM images of CoSiW<sub>11</sub>@CS after supercritical drying and coating with Au/Pd.

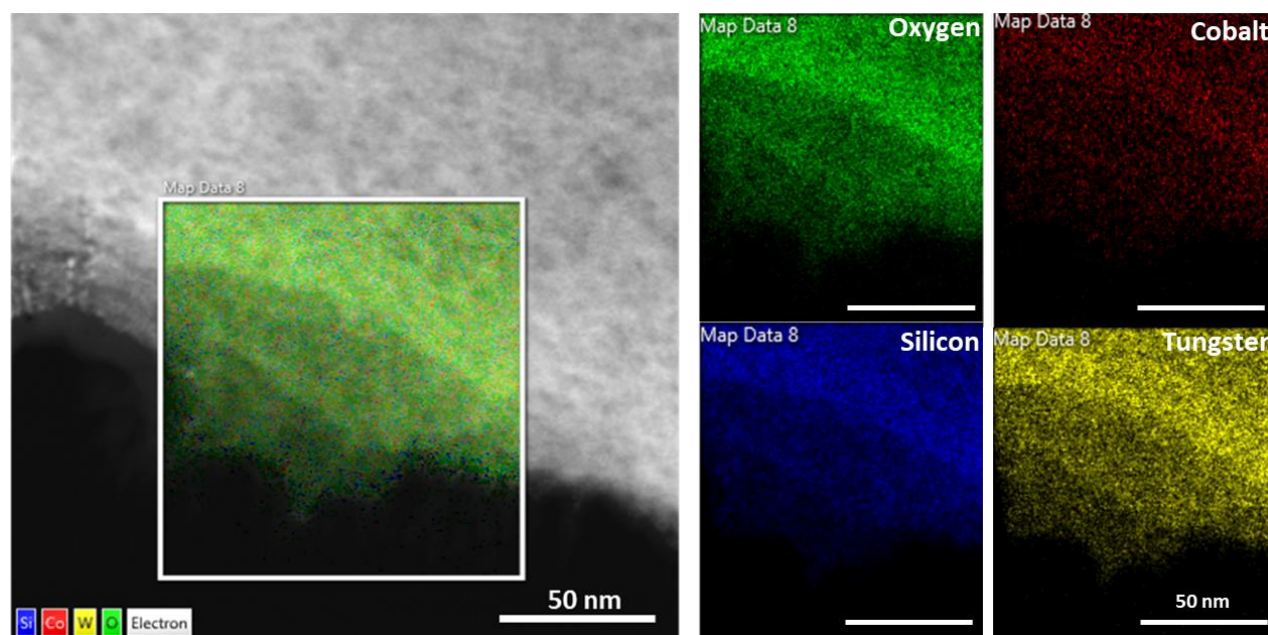

**Figure S3.** EDS imaging, via TEM, displaying the homogeneous dispersion of the elements of K<sub>6</sub>[Co(H<sub>2</sub>O)SiW<sub>11</sub>O<sub>39</sub>] throughout the CoSiW<sub>11</sub>@CS hydrogel.

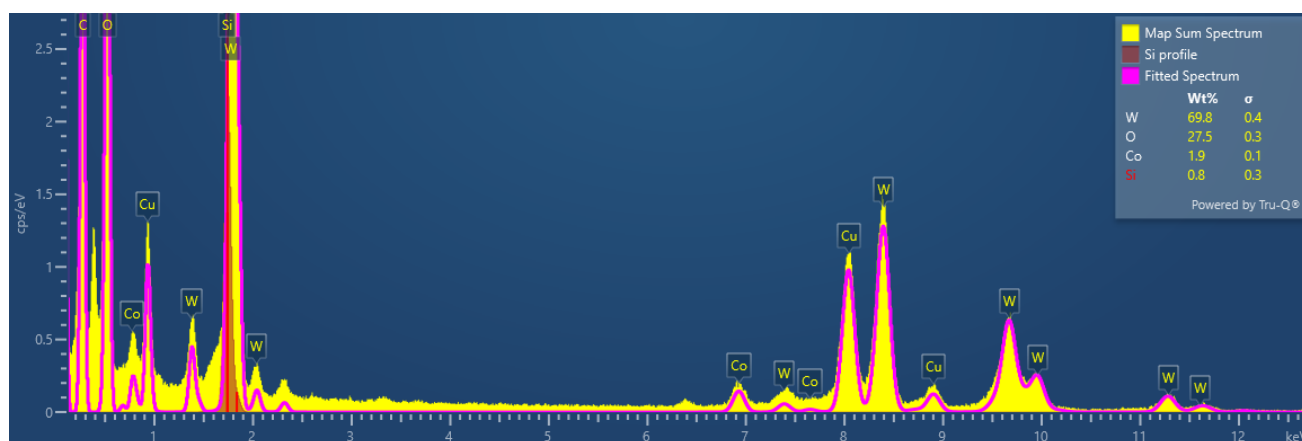

**Figure S4.** Corresponding EDS spectrum of CoSiW<sub>11</sub>@CS. Note that the presence of Cu and C peaks corresponded to the copper TEM grid coated in carbon.

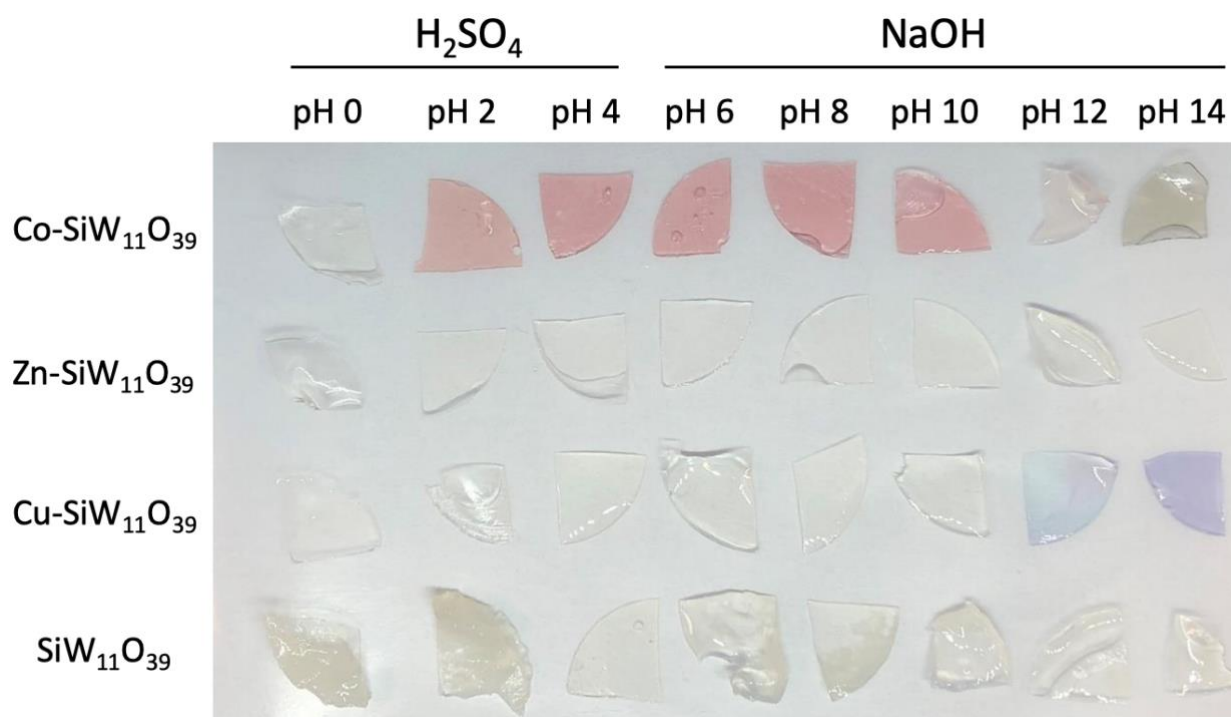

**Figure S5.** POM@CS hydrogels after 24 hours in solutions of different pH.

## Supporting Information

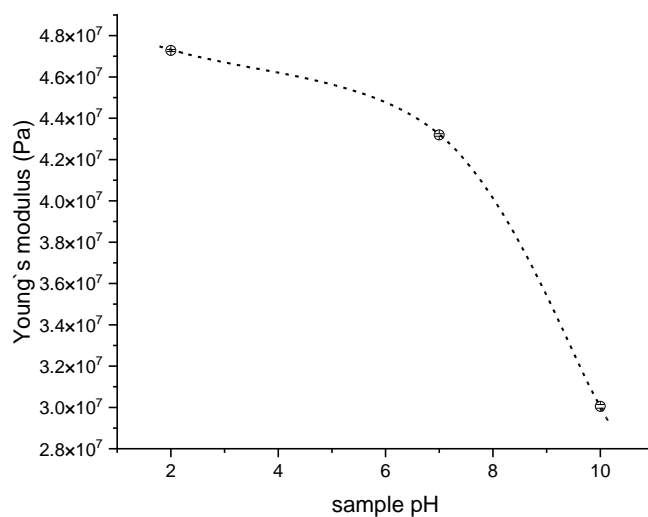

**Figure S6.** Young's modulus as a function of pH. The dotted line represents a guide for the general tendency of poorer stability and toughness at higher pH values.

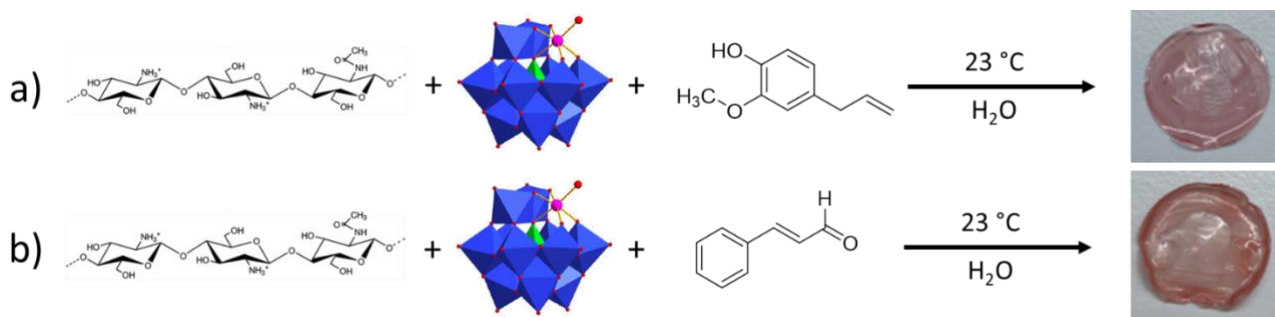

### Eugenol

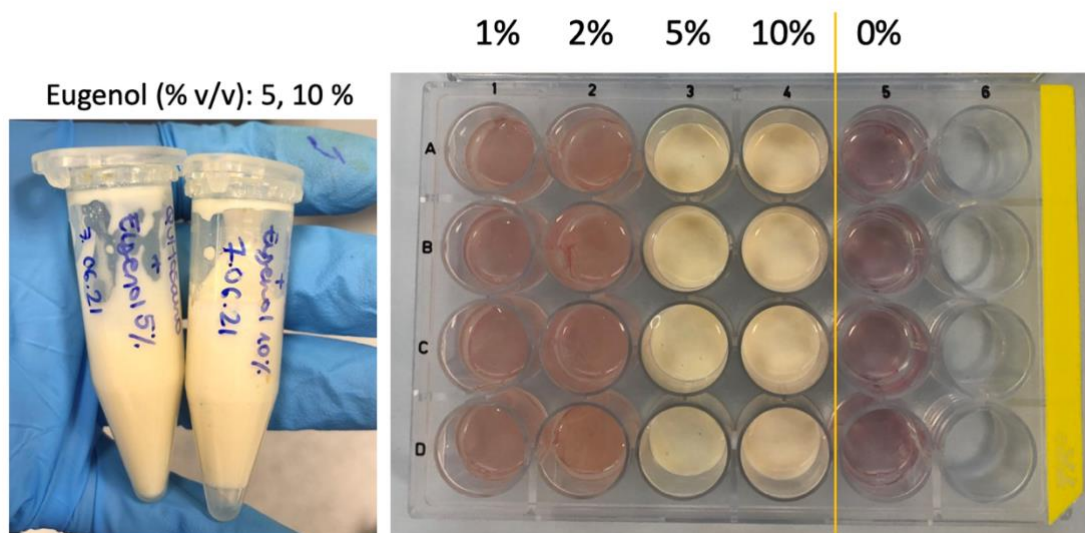

**Figure S7.** Synthesis of the CoSiW<sub>11</sub>@CS@oil hydrogels with: a) eugenol, b) cinnamon oil. Below: chitosan solution and the corresponding essential oil were added to an Eppendorf vial and emulsified using a sonic tip and placed in well-plates for gelation.

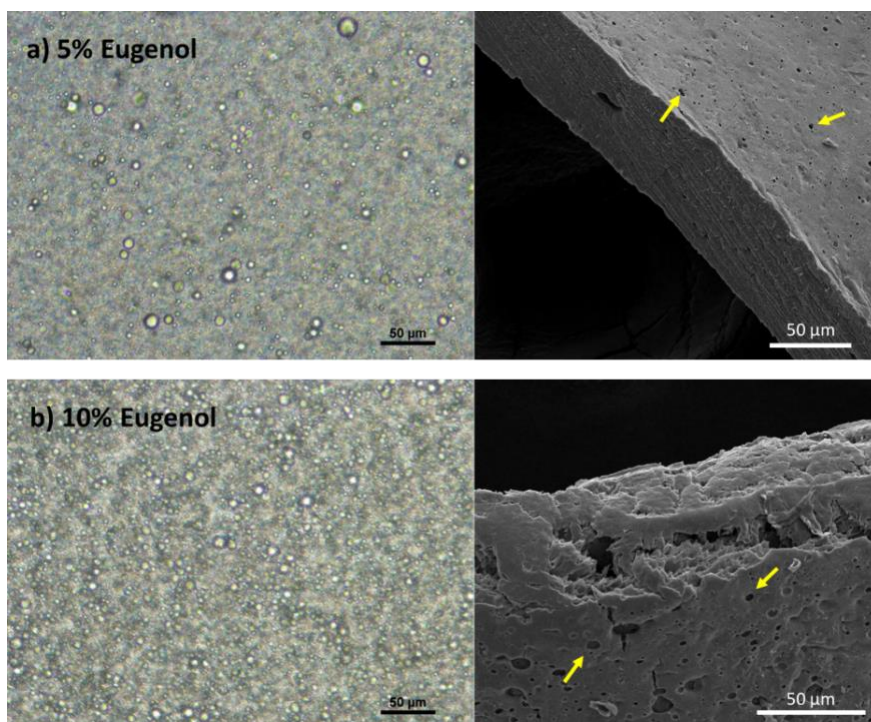

**Figure S8.** Optical microscopy imaging of 5 and 10% CoSiW<sub>11</sub>@CS@oil hydrogels (doped with eugenol) with yellow arrows on the SEM images highlighting the oil droplets in the hydrogel.

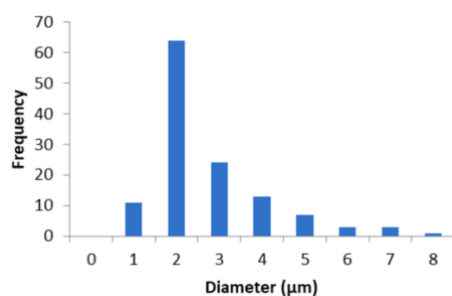

**Figure S9.** Size dispersion histogram of the oil droplets contained in CoSiW<sub>11</sub>@CS@oil hydrogels. Data obtained from ImageJ measurements of the oil droplet diameters obtained from SEM images.

**Table S1.** Minimum Inhibitory Concentration (MIC) values: starting materials, eugenol, and cinnamaldehyde.

| Compound                                              | MIC (mg/mL)    |                    |
|-------------------------------------------------------|----------------|--------------------|
|                                                       | <i>E. coli</i> | <i>B. subtilis</i> |
| K <sub>8</sub> [α-SiW <sub>11</sub> O <sub>39</sub> ] | >12.68         | 12.68              |
| Chitosan                                              | 0.25           | 0.15               |
| Eugenol                                               | 0.50           | 0.50               |
| Cinnamaldehyde                                        | 0.625          | 0.625              |

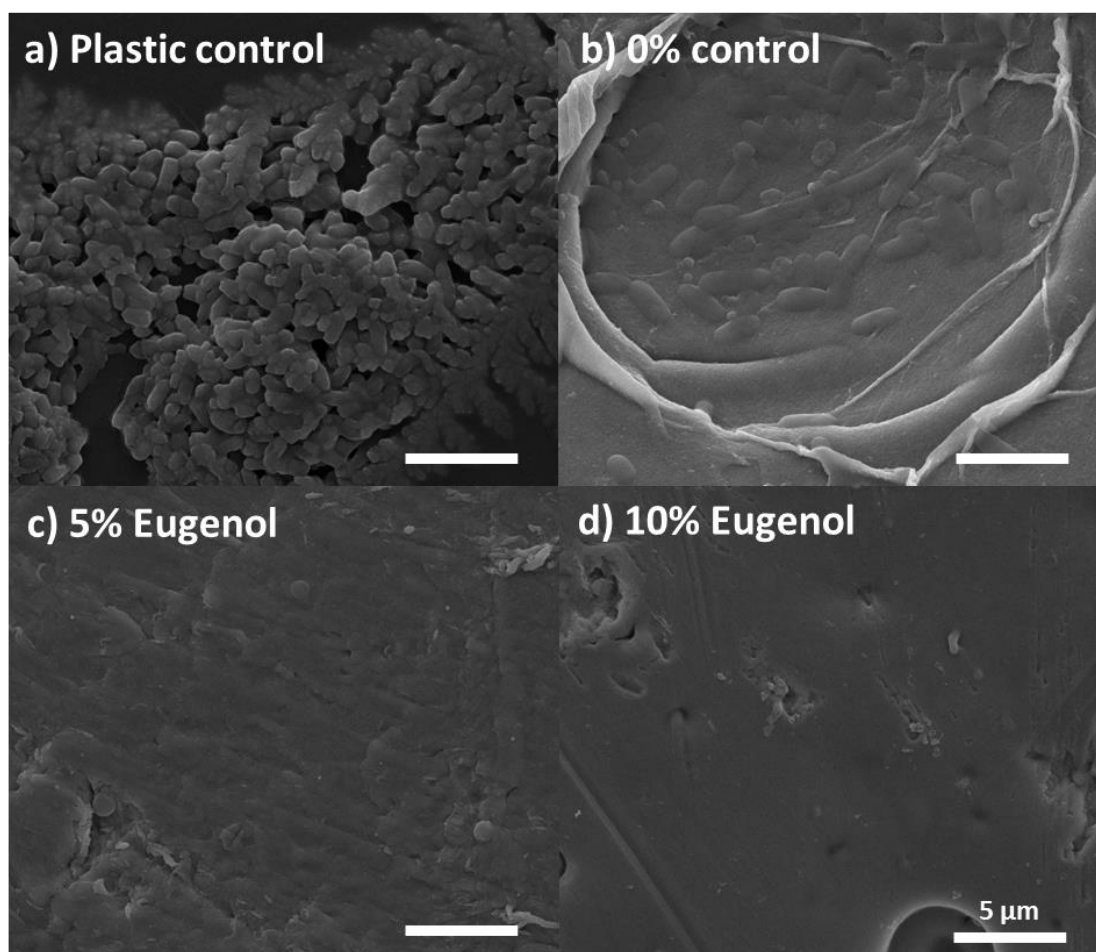

**Figure S10.** SEM imaging of washed samples; a) plastic control sample, b) CoSiW<sub>11</sub>@CS hydrogel (0% oil content) and eugenol doped CoSiW<sub>11</sub>@CS hydrogels; c) 5%, and d) 10%, after antibiofilm assay with *B. subtilis*.

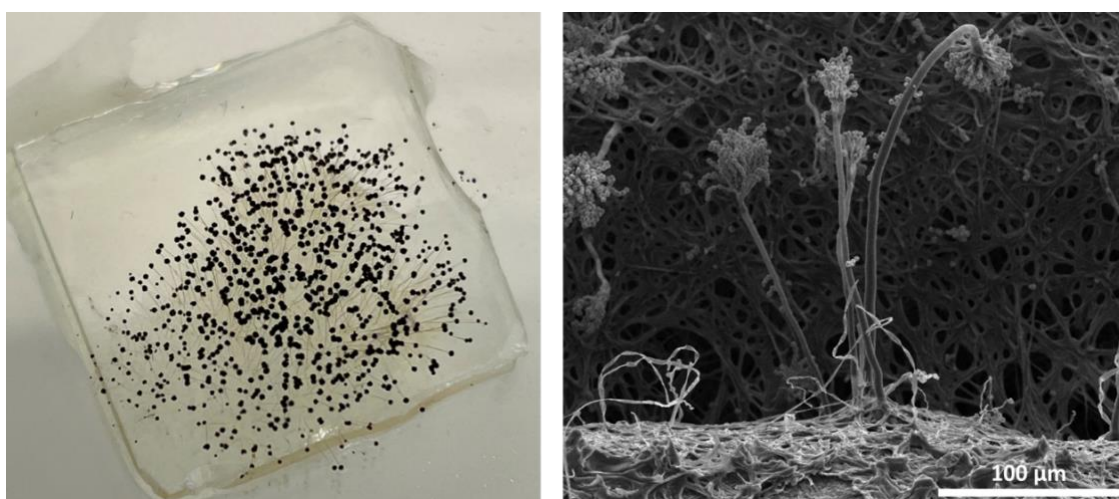

**Figure S11.** Conidiophores and conidia of *A. niger* visualised on the glass control sample (from the antifungal assay) and SEM imaging.

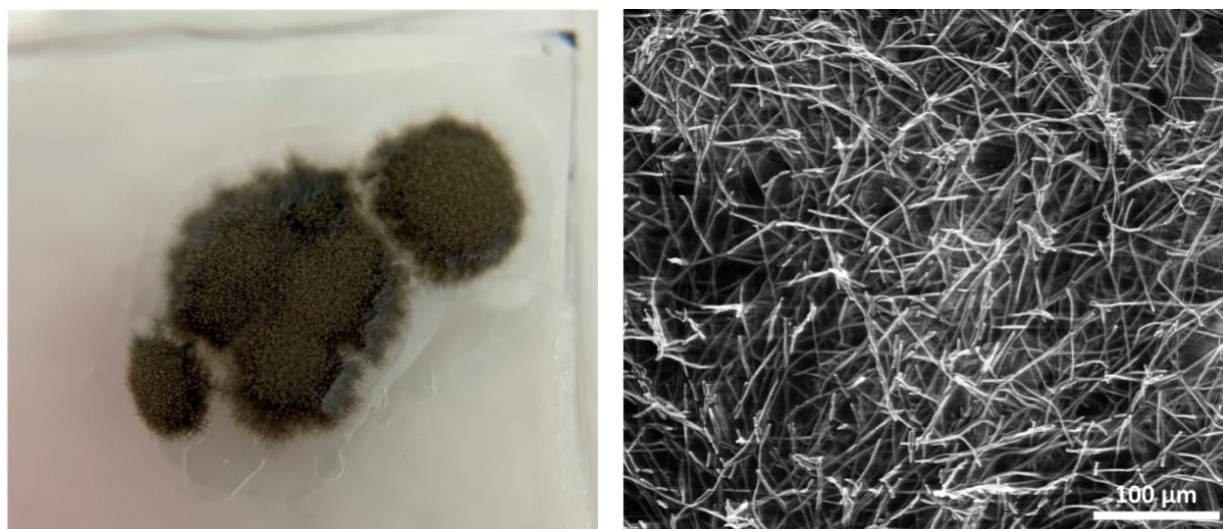

**Figure S12.** *C. cladosporioides* mould visualised on the glass control sample (from the antifungal assay) and SEM imaging.

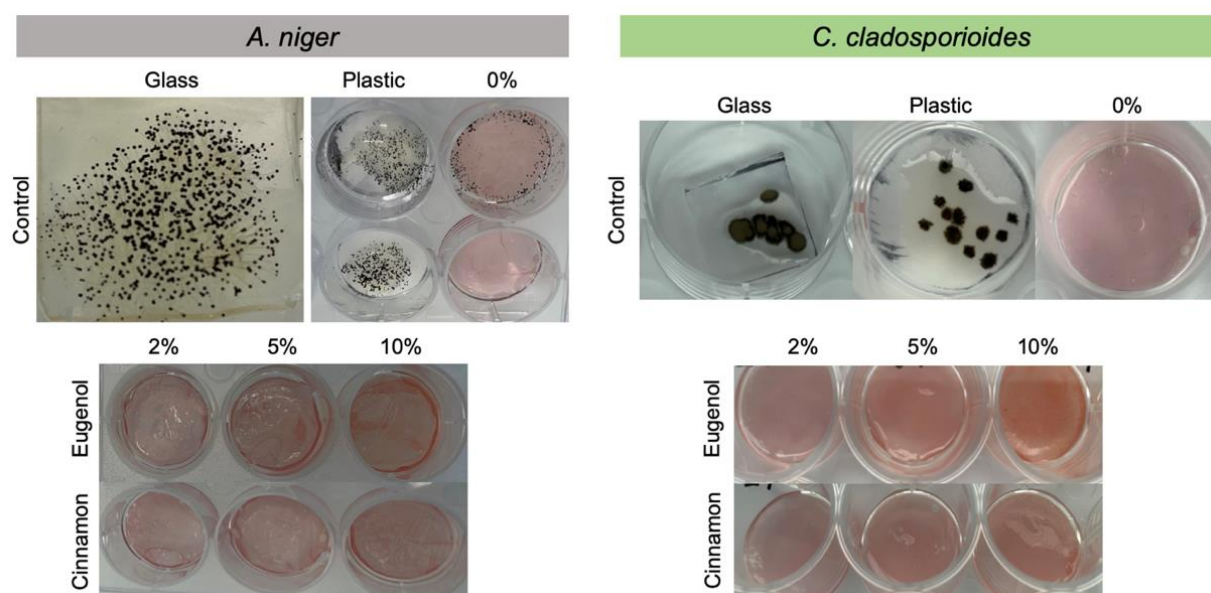

**Figure S13.** Performance of the CoSiW<sub>11</sub>@CS and CoSiW<sub>11</sub>@CS@oil hydrogels in antifungal assays against *A. niger* and *C. cladosporioides*, demonstrating the absence of fungal growth on CoSiW<sub>11</sub>@CS and CoSiW<sub>11</sub>@CS@oil hydrogels, compared with control growth on glass and on plastic.
